# Supplementary material for: A Two-Component System (XydS/R) Controls the Expression of Genes Encoding CBM6-Containing Proteins in Response to Straw in Clostridium cellulolyticum
Source: PubMed Central journal article supplement (PMC3572039; doi:10.1371/journal.pone.0056063), 2013-02-13
Supplement: pone.0056063.s001.pdf [file pone.0056063.s001.pdf]

**TABLE S1. Primers used in the study.**

| Primer name   | Sequence (5'-3') <sup>a</sup>                                  |
|---------------|----------------------------------------------------------------|
| 1227-1F       | GAGGGACACTTCTTACAGGCG                                          |
| 1227-1R       | GGTGTATCATTTAAAATCAAAGATGAGAGCT                                |
| 1227rtD       | CCAAGTTGGTTGGAATGGT                                            |
| 1228DownNar   | CATTAAGTGGCGCCCTATGCTTCACTCCTATACTCCTTTGG                      |
| 1228Δ116UpBam | TAGGATCCAGAATTTAAAAGGAGGGATTAAAATGGAAAGGTA<br>AAAGCTTTAATAATCG |
| 1228rtD       | GCCCAAGTCATTTTAGTACCATATT                                      |
| 1228rtR       | AACTGATTTTGTATTCTCCGGAG                                        |
| 1229-1F       | CCAAAGGAGTATAGGAGTGAAG                                         |
| 1229-1R       | GCCAAAGAAAGTCAATACCTTATATAC                                    |
| 1229-2F       | AATTCAAAAATTTATACCAATAC                                        |
| 1229-2R       | GGCTAATTTGTCTTATAAAGGTAG                                       |
| 1229-3F       | GGAGGTTCGAAAAGTCTAGATAC                                        |
| 1229-3R       | TGCAGACTATCCCATATTTTAC                                         |
| 1229qRT-F     | GCCGTGATGTTGCCTTTATT                                           |
| 1229qRT-R     | GTCCAATTCTGCCAACCCT                                            |
| 1229rtD       | TTGGAAACGGTGCTGGAGG                                            |
| 1229rtR       | TTGCAGACTATCCCATATTTTACC                                       |
| 1230GH10-NdeF | TTTGTTCCATATGATGGCCACAGGAAAG                                   |
| 1230GH10-XhoR | TTTGGCTCGAGTGAAAATGCACTTCTTGTTT                                |
| 1230rtD       | GGGGTTCACAATATCCAAACTGG                                        |
| 1230rtR       | GGCTGCACAGAACTTCCCG                                            |
| 1231rtD       | GCCACTGTCATACTCTTCGTTT                                         |
| 1231rtR       | GGCGACATTGACCCGACAG                                            |
| 1232rtD       | GAGTCCAGAGTAACATTCCGC                                          |
| 1232rtR       | CTGCATGGTATCGGTGGAAAT                                          |
| 1233rtD       | TTATGCAGATATTAACCTGGTTCCG                                      |
| 1233rtR       | CAAGCATTGCCTACCGTAAC                                           |
| 1234-NcoF     | CAGCCATGGCGGCAAACCCAAATCCGTCATG                                |
| 1234rtD       | GGAGATTACAGCGTATACAAGAGCAT                                     |
| 1234rtR       | ATTTCTGATAAGGCCCAAATCCC                                        |
| 1234-XhoR     | CCCCCCTCGAGCGCCTGAGCAGGGAATTTTG                                |
| 1235rtD       | ATGCTATTCAACAACAGATATGG                                        |
| 1235rtR       | AGATTTTGGCTCGGGAGCAT                                           |
| 1236rtD       | GTCTTTTAGTGCAGATAATTTCG                                        |
| 1236rtR       | AGCTATTATGGAGGGTGGGAA                                          |
| 1237-NdeF     | TCTTCTACATATGGATAACGGTCTTGCAAAAACA                             |
| 1237rtD       | GACCAGCGGAGGCAATATTGAGATTA                                     |
| 1237rtR       | TTCCAGGCAAGAGTAGCA                                             |
| 1237-XhoR     | CCCCCCTCGAGTGCTGCCCCCTGCC                                      |
| 1238rtD       | CCAACGGAGAAATTAACGCA                                           |
| 1238rtR       | GGAATAGTGAAGCACAGGCCAC                                         |
| 1239rtD       | CGGTGTAATTGTGGGAGTTG                                           |
| 1239rtR       | TCCCCACAGCTGACAATACA                                           |
| 1240rtD       | GGTCACAATACACTGGTAAATCAACTA                                    |
| 1240rtR       | GGCCGGGAAAGGTAAAAACACT                                         |

|               |                                                                  |
|---------------|------------------------------------------------------------------|
| 1241rtD       | CTGTGCCCCGTGGAAATTC                                              |
| 1241rtR       | TGGTCAACCGGGCATG                                                 |
| 1242rtD       | AGGTGCCAAGGTAATAGCCCC                                            |
| 1242rtR       | GGCACTGCAAATCAGACACGTCT                                          |
| 1243rtR       | TGGTTACAGCTACATATCTTTGATAAA                                      |
| 1656-1F       | GCTGCGGAATAAGGTATTAAC                                            |
| 1656-2F       | GAGGCTAAAATCTAAGAGAATAAG                                         |
| 1656-1R       | GCAATTAGAACTGATTAAGAAGG                                          |
| 1656-2R       | CTTAAAAGAGGAGGACAAGTATG                                          |
| 1656qRT-F     | TTGTCCTCCTCTTTTAAGTTATATT                                        |
| 1656qRT-R     | ACTGGTTAATCGATAGTCTCCTCCTCTTAAAT                                 |
| 1656rtD       | TTGTCCTCCTCTTTTAAGTTATATTA                                       |
| 1656rtR       | TCACTGCTGCTTACGTTT                                               |
| 1656UNK-NdeF  | GGAATTCCATATGACGCAGGCAGCCTATTACG                                 |
| 1656UNK-XhoR  | CCGCCGCTCGAGAGCGGAACCGCTCACTCTCAG                                |
| catdir        | ACCATCGATGGTCCTTGTTCTCCTTTTCTCTG                                 |
| catrev        | AACGAGCTCGGGAGGCCTAGAGAAAAGGAGAACAAGAA                           |
| EBS1d-xydR    | CAGATTGTACAAATGTGGTGATAACAGATAAGTCGCGGTCAGT<br>AACTTACCTTTCTTTGT |
| EBS2-xydR     | TGAACGCAAGTTTCTAATTTTCGATTTTTATTCGATAGAGGAAAG<br>TGTCT           |
| EBS Universal | CGAAATTAGAACTTGCCTTCAGTAAAC                                      |
| IBS-xydR      | AAAAAAGCTTATAATTATCCTTAATAAACGCGGTCGTGCGCCC<br>AGATAGGGTG        |
| MBP-Δ116F     | ATATGGATCCGAAAAGGTAAAAGCTTTAATAATCGAT                            |
| MBP-Δ116R     | TAAACTGCAGCTATGCTTCACTCCTATACTCCTTTG                             |
| RPO-F         | AAACATAGTCAAGAAAGTAGAAAAG                                        |
| RPO-R         | CTATACTAACAACCAGCCTTAAG                                          |
| tetd          | TCCCCCGGGATTTGGTACTTGAAAAG                                       |
| tetr          | CATATCGATAGAGCCGATAAAATGAGATTAATAC                               |

<sup>a</sup> Relevant restriction sites are underlined
